# Supplementary material
Source: PubMed Central journal article supplement (PMC10423604)
Supplement: flgastro-2023-102384supp001.pdf [file flgastro-2023-102384supp001.pdf]

## Birth

Please complete the survey below.

Thank you!

- 
- 1) Timing of Delivery:  
The decision for timing of birth should be made by :
- Obstetrics  
 CIF team  
 MDT including obstetric and CIF team  
 I don't know
- 
- 2) At what gestation should delivery be considered in the absence of fetal compromise?
- < 37 weeks  
 37-40weeks  
 >40 weeks  
 I don't know
- 
- 3) The decision to define the mode of infant delivery should be individualised according to patient specific factors?
- Strongly agree  
 Agree  
 Neutral  
 Disagree  
 Strongly disagree  
 I don't know

### Please specify patient factors that would mean you would recommend caesarean section, rather than vaginal delivery:

|                                  | Strongly agree        | Agree                 | Neutral               | Disagree              | Strongly disagree     | I don't know          |
|----------------------------------|-----------------------|-----------------------|-----------------------|-----------------------|-----------------------|-----------------------|
| 4) Absence of a stoma            | <input type="radio"/> |
| 5) Presence of perianal disease  | <input type="radio"/> |
| 6) Multiple abdominal surgeries  | <input type="radio"/> |
| 7) Obstetric indications only    | <input type="radio"/> |
| 8) CIPO diagnosis                | <input type="radio"/> |
| 9) Presence of ileo-anal pouch   | <input type="radio"/> |
| 10) Poor abdominal wall strength | <input type="radio"/> |
