# Supplementary material
Source: PubMed Central journal article supplement (PMC10423604)
Supplement: flgastro-2023-102384supp003.pdf [file flgastro-2023-102384supp003.pdf]

# Lactation

Please complete the survey below.

Thank you!

## Following delivery of the child, would you recommend

|                    | Strongly agree        | Agree                 | Neutral               | Disagree              | Strongly disagree     |
|--------------------|-----------------------|-----------------------|-----------------------|-----------------------|-----------------------|
| 1) Breast feeding  | <input type="radio"/> |
| 2) Bottle Feeding  | <input type="radio"/> |
| 3) Maternal choice | <input type="radio"/> |

## If the mother with chronic intestinal failure is breast feeding, please select the frequency which best represents your usual practice or that which you consider to be best practice

|                                                  | 2 weekly              | 4 weekly              | 6 weekly              | 8 weekly              | >8 weekly             |
|--------------------------------------------------|-----------------------|-----------------------|-----------------------|-----------------------|-----------------------|
| 4) Frequency of physical clinical review         | <input type="radio"/> |
| 5) Frequency of maternal blood sampling          | <input type="radio"/> |
| 6) Frequency of assessment of nutritional status | <input type="radio"/> |

## Please select the option below which best describes your opinion or experience with regarding PN formulation in association with breast feeding:

|                                        | Increase              | Decrease              | Remain the same       | An individualised approach taken |
|----------------------------------------|-----------------------|-----------------------|-----------------------|----------------------------------|
| 7) Energy requirements/calorie content | <input type="radio"/> | <input type="radio"/> | <input type="radio"/> | <input type="radio"/>            |
| 8) Lipid content                       | <input type="radio"/> | <input type="radio"/> | <input type="radio"/> | <input type="radio"/>            |
| 9) Protein content                     | <input type="radio"/> | <input type="radio"/> | <input type="radio"/> | <input type="radio"/>            |
| 10) Vitamins/Micronutrients content    | <input type="radio"/> | <input type="radio"/> | <input type="radio"/> | <input type="radio"/>            |

- 11) Are there specific vitamin and/or micronutrient changes you would typically make during this period?
-
