# Supplementary material
Source: PubMed Central journal article supplement (PMC10423604)
Supplement: flgastro-2023-102384supp004.pdf [file flgastro-2023-102384supp004.pdf]

## Opinions

Please complete the survey below.

Thank you!

---

In your opinion or experience, is the fertility of women receiving home parenteral support generally:

- Increased
- Decreased
- Same as general population
- My experience is too small to make reliable comment
- It depends on the patient's underlying disease or clinical condition'

---

In your opinion or experience, is the fertility of men receiving home parenteral support

- Increased
- Decreased
- Same as general population
- My experience is too small to make reliable comment
- It depends on the patient's underlying disease or clinical condition

---

In your opinion should women with CIF be advised against pregnancy?

- Yes
- No
- No opinion

---

Unless brought up by your patient, would you routinely discuss contraception for Home Parenteral Nutrition-dependent patients?

- Yes
- No

---

If Yes. Which option best represents your opinion or standard recommendation on contraception for HPN-dependent patients?

- No contraception or left to patient choice
- Routinely recommend a single method
- Recommend two forms of contraception e.g, hormonal and barrier

---

In your opinion or experience, are fetal abnormalities for women receiving home parenteral support:

- More frequent
- Less frequent
- Same as general population
- My experience is too small to make reliable comment

---

In your opinion or experience, are pregnancy-related maternal complications, in women receiving treatment with home parenteral support:

- More frequent
- Less frequent
- Same as general population
- My experience is too small to make reliable comment

---

In your opinion or experience, preterm delivery for women receiving home parenteral support is:

- More frequent
- Less frequent
- Same as general population
- My experience is too small to make reliable comment

---

In your opinion or experience, the infant birth weight corrected for gestation at delivery seen for women receiving home parenteral support is:

- Above average
- Below Average
- Same as general population
- My experience is too small to make reliable comment

**HPN specific complications.****In your opinion or experience is a pregnant women more likely to have a CIF related complication?**

|                                                     | Strongly agree        | Agree                 | Neutral               | Disagree              | Strongly disagree     |
|-----------------------------------------------------|-----------------------|-----------------------|-----------------------|-----------------------|-----------------------|
| Catheter related blood stream infection (CRBSI)     | <input type="radio"/> |
| CVC associated thrombosis                           | <input type="radio"/> |
| Intestinal failure associated liver disease (IFALD) | <input type="radio"/> |

**Please rank the underlying intestinal failure disease according to its impact on the risk to conception. (1- highest risk 8- lowest risk)**

|                              | 1                     | 2                     | 3                     | 4                     | 5                     | 6                     | 7                     | 8                     |
|------------------------------|-----------------------|-----------------------|-----------------------|-----------------------|-----------------------|-----------------------|-----------------------|-----------------------|
| CIPO                         | <input type="radio"/> |
| Crohn's disease              | <input type="radio"/> |
| Mesenteric ischaemia         | <input type="radio"/> |
| Mucosal disease e.g. coeliac | <input type="radio"/> |
| Radiation enteritis          | <input type="radio"/> |
| Scleroderma                  | <input type="radio"/> |
| Surgical complication        | <input type="radio"/> |
| Immunodeficiency disorder    | <input type="radio"/> |

**Please rank the underlying intestinal failure disease according to its impact on the risk of a successful pregnancy. (1- highest risk and 8- lowest risk)**

|                              | 1                     | 2                     | 3                     | 4                     | 5                     | 6                     | 7                     | 8                     |
|------------------------------|-----------------------|-----------------------|-----------------------|-----------------------|-----------------------|-----------------------|-----------------------|-----------------------|
| CIPO                         | <input type="radio"/> |
| Crohn's disease              | <input type="radio"/> |
| Mesenteric ischaemia         | <input type="radio"/> |
| Mucosal disease e.g. coeliac | <input type="radio"/> |
| Radiation enteritis          | <input type="radio"/> |
| Scleroderma                  | <input type="radio"/> |
| Surgical complication        | <input type="radio"/> |
| Immunodeficiency disorders   | <input type="radio"/> |

Do you routinely check Essential Fatty Acid (EFA) levels as part of pregnancy management in chronic intestinal failure?  Yes  No

If yes, at what points would you typically check them?

- Pre-conception  
 Pregnancy  
 Post-natal  
 During duration of breastfeeding

In your opinion, would a specialist IF-pregnancy service improve care/outcomes for pregnant patients with chronic intestinal failure?  Yes  No  No opinion
