# Supplementary material
Source: PubMed Central journal article supplement (PMC10423604)
Supplement: flgastro-2023-102384supp005.pdf [file flgastro-2023-102384supp005.pdf]

## Post-natal

Please complete the survey below.

Thank you!

### During the post-natal period please select the frequency which best supports your clinical practice or opinion of best practice.

|                                                  | 2 weekly              | 4 weekly              | 6 weekly              | 8 weekly              | >8 weekly             |
|--------------------------------------------------|-----------------------|-----------------------|-----------------------|-----------------------|-----------------------|
| 1) Frequency of physical clinical review         | <input type="radio"/> |
| 2) Frequency of maternal blood sampling          | <input type="radio"/> |
| 3) Frequency of assessment of nutritional status | <input type="radio"/> |

### HPN adjustments: Please select the option below which best describes your general opinion or experience with regarding PN formulation during the post-natal period when the mother is breast feeding:

|                                        | Increase              | Decrease              | Remain the same       |
|----------------------------------------|-----------------------|-----------------------|-----------------------|
| 4) Energy requirements/calorie content | <input type="radio"/> | <input type="radio"/> | <input type="radio"/> |
| 5) Lipid content                       | <input type="radio"/> | <input type="radio"/> | <input type="radio"/> |
| 6) Protein content                     | <input type="radio"/> | <input type="radio"/> | <input type="radio"/> |
| 7) Vitamins/Micronutrients content     | <input type="radio"/> | <input type="radio"/> | <input type="radio"/> |

### HPN adjustments: Please select the option below which best describes your general opinion or experience with regarding PN formulation during the post-natal period when the mother is NOT breast feeding:

|                                        | Increase              | Decrease              | Remain the same       |
|----------------------------------------|-----------------------|-----------------------|-----------------------|
| 8) Energy requirements/calorie content | <input type="radio"/> | <input type="radio"/> | <input type="radio"/> |
| 9) Lipid content                       | <input type="radio"/> | <input type="radio"/> | <input type="radio"/> |
| 10) Protein content                    | <input type="radio"/> | <input type="radio"/> | <input type="radio"/> |
| 11) Vitamins/Micronutrient content     | <input type="radio"/> | <input type="radio"/> | <input type="radio"/> |

- 12) Please specify any vitamin or micronutrient changes you would make during the post-natal period?
-
