# Supplementary material
Source: PubMed Central journal article supplement (PMC10423604)
Supplement: flgastro-2023-102384supp006.pdf [file flgastro-2023-102384supp006.pdf]

## Pre-conception

Please complete the survey below.

Thank you!

### When considering pre-conception counselling in an HPN-dependent patient please select the option which best represents your typical practice:

|                                                    | Strongly agree        | Agree                 | Neutral               | Disagree              | Strongly disagree     |
|----------------------------------------------------|-----------------------|-----------------------|-----------------------|-----------------------|-----------------------|
| 1) Routine to all women of childbearing age        | <input type="radio"/> |
| 2) Reactive (if asked by the patient)              | <input type="radio"/> |
| 3) You feel this is not part of your clinical role | <input type="radio"/> |

### When discussing pregnancy with an HPN-dependent patient, do you:

|                                                                     | Strongly agree        | Agree                 | Neutral               | Disagree              | Strongly disagree     |
|---------------------------------------------------------------------|-----------------------|-----------------------|-----------------------|-----------------------|-----------------------|
| 4) Typically counsel positively about becoming pregnant             | <input type="radio"/> |
| 5) Typically counsel negatively against becoming pregnant           | <input type="radio"/> |
| 6) Advice is based upon an individualised patient-specific decision | <input type="radio"/> |

### Please rank the following in order of importance to inform decisions about becoming pregnant (1=most important, 6=least important):

|                                                                 | 1                     | 2                     | 3                     | 4                     | 5                     | 6                     |
|-----------------------------------------------------------------|-----------------------|-----------------------|-----------------------|-----------------------|-----------------------|-----------------------|
| 7) Underlying disease                                           | <input type="radio"/> |
| 8) Patient history of HPN-related complications                 | <input type="radio"/> |
| 9) Nutritional status                                           | <input type="radio"/> |
| 10) Psychological complications                                 | <input type="radio"/> |
| 11) Pharmacological treatment and risk of fetus                 | <input type="radio"/> |
| 12) Perception of available fetal medicine or obstetric support | <input type="radio"/> |

**If a patient expresses a wish to conceive, prior to conception, the frequency of outpatient follow up should be:**

|                                                                                                                       | Strongly agree        | Agree                           | Neutral               | Disagree              | Strongly disagree     |
|-----------------------------------------------------------------------------------------------------------------------|-----------------------|---------------------------------|-----------------------|-----------------------|-----------------------|
| 13) Increased                                                                                                         | <input type="radio"/> | <input type="radio"/>           | <input type="radio"/> | <input type="radio"/> | <input type="radio"/> |
| 14) Decreased                                                                                                         | <input type="radio"/> | <input type="radio"/>           | <input type="radio"/> | <input type="radio"/> | <input type="radio"/> |
| 15) Stay the same                                                                                                     | <input type="radio"/> | <input type="radio"/>           | <input type="radio"/> | <input type="radio"/> | <input type="radio"/> |
| 16) Altered on an individualised basis                                                                                | <input type="radio"/> | <input type="radio"/>           | <input type="radio"/> | <input type="radio"/> | <input type="radio"/> |
| 17) What frequency of outpatient review would you consider to be appropriate for a woman actively trying to conceive? |                       |                                 |                       |                       |                       |
|                                                                                                                       |                       | <input type="radio"/> 2 weekly  |                       |                       |                       |
|                                                                                                                       |                       | <input type="radio"/> 4 weekly  |                       |                       |                       |
|                                                                                                                       |                       | <input type="radio"/> 6 weekly  |                       |                       |                       |
|                                                                                                                       |                       | <input type="radio"/> 8 weekly  |                       |                       |                       |
|                                                                                                                       |                       | <input type="radio"/> >8 weekly |                       |                       |                       |

**If one of your HPN patients expressed a wish to become pregnant, how would you manage their parenteral support formulation**

|                                                                                                                                           | Strongly agree        | Agree                 | Neutral               | Disagree              | Strongly disagree     |
|-------------------------------------------------------------------------------------------------------------------------------------------|-----------------------|-----------------------|-----------------------|-----------------------|-----------------------|
| 18) No change to the parenteral support prescription is required if the patient's weight is optimal and she is well                       | <input type="radio"/> |
| 19) An Individualised approach to parenteral support prescription is required according to the patient's specific clinical factors        | <input type="radio"/> |
| 20) Standard pre-conception adjustments to the to the parenteral support prescription are required for all patients considering pregnancy | <input type="radio"/> |

**Prior to conception, in order to optimise and allow for the best outcome of pregnancy, please select the action which best describes your practice:**

|                                                                                                | Increase              | Decrease              | Remain the same       | Tailor to the patient's individual nutritional needs |
|------------------------------------------------------------------------------------------------|-----------------------|-----------------------|-----------------------|------------------------------------------------------|
| 21) Energy requirements                                                                        | <input type="radio"/> | <input type="radio"/> | <input type="radio"/> | <input type="radio"/>                                |
| 22) Lipid content                                                                              | <input type="radio"/> | <input type="radio"/> | <input type="radio"/> | <input type="radio"/>                                |
| 23) Protein content                                                                            | <input type="radio"/> | <input type="radio"/> | <input type="radio"/> | <input type="radio"/>                                |
| 24) Vitamins/Micronutrients content                                                            | <input type="radio"/> | <input type="radio"/> | <input type="radio"/> | <input type="radio"/>                                |
| 25) Please specify any specific changes that you would consider essential prior to conception. |                       |                       |                       |                                                      |

---

26) During the pre-conception phase, which of the following would you feel essential to check in your patient?

- Thyroid function
- Lipid profile
- HbA1C
- Copper
- Iron
- Selenium
- Manganese
- Zinc
- B12
- Folate
- Vitamin A
- Vitamin D
- Vitamin E
