# Supplementary material
Source: PubMed Central journal article supplement (PMC10423604)
Supplement: flgastro-2023-102384supp007.pdf [file flgastro-2023-102384supp007.pdf]

# Pregnancy

Please complete the survey below.

Thank you!

## During the first trimester please select what you generally consider to be the most appropriate interval for each clinical factor.

|                                               | 2 weekly              | 4 weekly              | 6 weekly              | 8 weekly              | >8 weekly             |
|-----------------------------------------------|-----------------------|-----------------------|-----------------------|-----------------------|-----------------------|
| Frequency of physical clinical review         | <input type="radio"/> |
| Frequency of maternal blood sampling          | <input type="radio"/> |
| Frequency of assessment of nutritional status | <input type="radio"/> |

## During the second trimester please select what you generally consider to be the most appropriate interval for each clinical factor

|                                               | 2 weekly              | 4 weekly              | 6 weekly              | 8 weekly              | >8 weekly             |
|-----------------------------------------------|-----------------------|-----------------------|-----------------------|-----------------------|-----------------------|
| Frequency of physical clinical review         | <input type="radio"/> |
| Frequency of maternal blood sampling          | <input type="radio"/> |
| Frequency of assessment of nutritional status | <input type="radio"/> |

## During the third trimester please select what you generally consider to be the most appropriate interval for each clinical factor

|                                               | 2 weekly              | 4 weekly              | 6 weekly              | 8 weekly              | >8 weekly             |
|-----------------------------------------------|-----------------------|-----------------------|-----------------------|-----------------------|-----------------------|
| Frequency of physical clinical review         | <input type="radio"/> |
| Frequency of maternal blood sampling          | <input type="radio"/> |
| Frequency of assessment of nutritional status | <input type="radio"/> |

## For pregnant women attending the high risk obstetric clinic, please select the time interval most appropriate for each factor:

|                                                     | 2 weekly              | 4 weekly              | 6 weekly              | 8 weekly              | >8 weekly             | Don't know            |
|-----------------------------------------------------|-----------------------|-----------------------|-----------------------|-----------------------|-----------------------|-----------------------|
| 1st trimester-Frequency of physical clinical review | <input type="radio"/> |
| 1st trimester-Frequency of fetal ultrasound         | <input type="radio"/> |

|                                                     |                       |                       |                       |                       |                       |                       |
|-----------------------------------------------------|-----------------------|-----------------------|-----------------------|-----------------------|-----------------------|-----------------------|
| 2nd trimester-Frequency of physical clinical review | <input type="radio"/> |
| 2nd trimester-Frequency of fetal ultrasound         | <input type="radio"/> |
| 3rd trimester-Frequency of physical clinical review | <input type="radio"/> |
| 3rd trimester- Frequency of fetal ultrasound        | <input type="radio"/> |

Would you monitor more closely for intrahepatic cholestasis of pregnancy in an HPN-dependent mother compared to other pregnant mothers?

Yes  
 No

Would you screen for gestational diabetes?

Yes  
 No

If yes, when would you screen?

Booking  
 24-28 weeks  
 Both time points

Would you monitor more closely for pre-eclampsia in an HPN-dependent mother compared to other pregnant mothers?

Yes  
 No

If yes, how would you facilitate this? (you may choose more than one option)

Increased community midwife visits  
 Increased hospital clinic visits  
 Home Blood Pressure self-monitoring

**HPN adjustments, compared to preconception PN: Please select the option below which best describes your general opinion or experience with regarding PN formulation during the 1st Trimester/2nd Trimester/3rd Trimester:**

|                                                  | Increase              | Decrease              | Remain the same       | It depends on general/individual requirements |
|--------------------------------------------------|-----------------------|-----------------------|-----------------------|-----------------------------------------------|
| 1st trimester-Energy requirements/energy content | <input type="radio"/> | <input type="radio"/> | <input type="radio"/> | <input type="radio"/>                         |
| 1st trimester-Lipid content                      | <input type="radio"/> | <input type="radio"/> | <input type="radio"/> | <input type="radio"/>                         |
| 1st trimester-Nitrogen content                   | <input type="radio"/> | <input type="radio"/> | <input type="radio"/> | <input type="radio"/>                         |
| 1st trimester-Vitamins/Micronutrients content    | <input type="radio"/> | <input type="radio"/> | <input type="radio"/> | <input type="radio"/>                         |
| 2nd trimester-Energy requirements/energy content | <input type="radio"/> | <input type="radio"/> | <input type="radio"/> | <input type="radio"/>                         |
| 2nd trimester-Lipid content                      | <input type="radio"/> | <input type="radio"/> | <input type="radio"/> | <input type="radio"/>                         |
| 2nd trimester-Nitrogen content                   | <input type="radio"/> | <input type="radio"/> | <input type="radio"/> | <input type="radio"/>                         |

|                                                  |                       |                       |                       |                       |
|--------------------------------------------------|-----------------------|-----------------------|-----------------------|-----------------------|
| 2nd trimester-Vitamins/Micronutrients content    | <input type="radio"/> | <input type="radio"/> | <input type="radio"/> | <input type="radio"/> |
| 3rd trimester-Energy requirements/energy content | <input type="radio"/> | <input type="radio"/> | <input type="radio"/> | <input type="radio"/> |
| 3rd trimester-Lipid content                      | <input type="radio"/> | <input type="radio"/> | <input type="radio"/> | <input type="radio"/> |
| 3rd trimester-Nitrogen content                   | <input type="radio"/> | <input type="radio"/> | <input type="radio"/> | <input type="radio"/> |
| 3rd trimester-Vitamins/Micronutrients content    | <input type="radio"/> | <input type="radio"/> | <input type="radio"/> | <input type="radio"/> |

Consider the whole pregnancy. Which lipid emulsion would you recommend during pregnancy?

- Olive oil based  
 Fish oil based  
 Soya based  
 Combination lipids (e.g. 'SMOF')  
 Other

What percentage of calorie requirements provided by lipid source would you consider to be optimal during pregnancy?

- 0%  
 1-20%  
 21-40%  
 41-60%  
 >61%  
 Don't know

Please specify any specific Vitamin/Micronutrients change you would make during pregnancy? \_\_\_\_\_

For women with diabetes during pregnancy, in order to optimise blood glucose management, please select the option which best describes your opinion or usual practice.

- Switch to an exclusive lipid regime  
 Glucose inclusive regime with insulin  
 I don't know

**During the pregnancy should the liver function tests becoming abnormal in the absence of biliary obstruction or other cause such as HELLP syndrome, please select the action which you think would be most appropriate (more than one can be selected):**

|                                                                                           | Strongly agree        | Agree                 | Neutral               | Disagree              | Strongly disagree     |
|-------------------------------------------------------------------------------------------|-----------------------|-----------------------|-----------------------|-----------------------|-----------------------|
| Assume intrahepatic cholestasis of pregnancy and monitor                                  | <input type="radio"/> |
| Measure bile acids to distinguish between intrahepatic cholestasis in pregnancy and IFALD | <input type="radio"/> |
| Reduce lipid content of parenteral support                                                | <input type="radio"/> |

Do you feel that pregnant women receiving home parenteral are at increased risk of central venous catheter associated thrombosis?

- Yes  
 No  
 I don't know

**If yes, please select the option below which best describes your opinion or experience which is best employed to manage this risk**

|                                                            | Strongly agree        | Agree                 | Neutral               | Disagree              | Strongly disagree     |
|------------------------------------------------------------|-----------------------|-----------------------|-----------------------|-----------------------|-----------------------|
| Prophylactic subcutaneous Low Molecular Weight Heparin     | <input type="radio"/> |
| Therapeutic subcutaneous Low Molecular Weight Heparin      | <input type="radio"/> |
| Prophylactic therapy with a novel oral anticoagulant agent | <input type="radio"/> |
| No intervention and monitor accepting increased risk       | <input type="radio"/> |

Would you consider the use of Taurolidine-based lock in all pregnant patients who receive home parental support at risk of catheter related blood stream infections?

Yes  
 No

Have you used Taurolidine in pregnancy?

Yes  
 No

If yes, would you usual recommend withdrawal from the CVC rather than flushing through into the circulation?

Yes  
 No
